# Supplementary material
Source: PubMed Central journal article supplement (PMC4775117)
Supplement: supp_pp.15.01377_01377figstbls.pdf [file supp_pp.15.01377_01377figstbls.pdf]

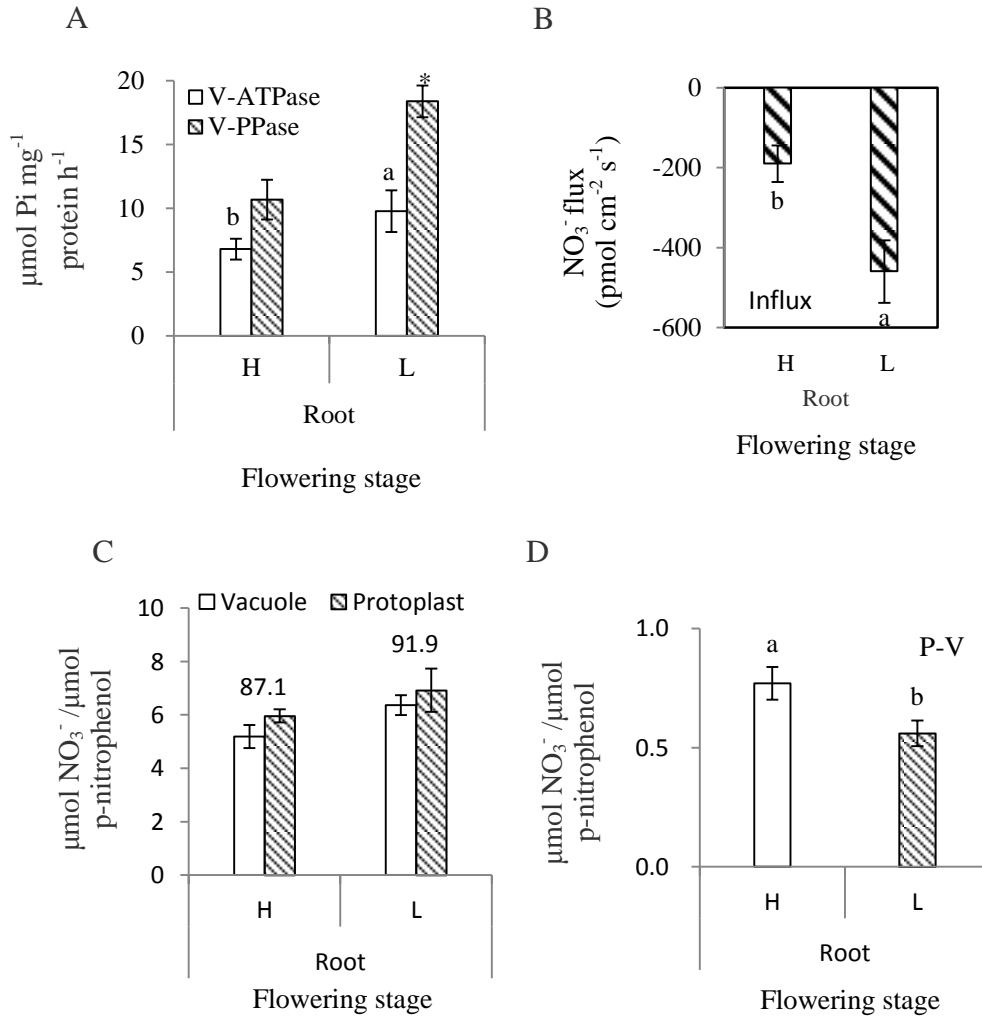

**Supplemental Figure 1.** *B. napus* with higher NUE showed lower vacuolar sequestration capacity (VSC) for  $\text{NO}_3^-$  in roots at flowering stage.

H refers to the high-NUE oilseed rape genotype Xiangyou15 and L refers to the low-NUE genotype 814. Specific activities of the tonoplast proton pumps are expressed as  $\mu\text{mol Pi released mg}^{-1} \text{ protein h}^{-1}$ .  $\text{NO}_3^-$  fluxes are expressed as  $\text{pmol NO}_3^- \text{ cm}^{-2} \text{ S}^{-1}$ . Mature vacuoles were collected from root tissues at the flowering stage. A microelectrode was vibrated in the measuring solution between the two positions, 1  $\mu\text{m}$  and 11  $\mu\text{m}$  from the vacuole surface (tonoplast), along an axis perpendicular to the tangent of vacuoles recording the stable reading data. The background was recorded by vibrating the electrode in measuring solution without vacuoles. Protoplasts and vacuoles isolated from roots of hydroponically grown plants were used for measuring  $\text{NO}_3^-$  concentration and  $\text{NO}_3^-$  accumulation normalized against the specific activity of the vacuole acid phosphatase (ACP) as described in Materials and Methods; thus plotted as  $\mu\text{mol NO}_3^-$  per  $\mu\text{mol p-nitrophenol}$ , the end product of ACP assay.

Proton pump activities in root tissues of H and L genotypes are shown at flowering stage (A). Different letters at the top of the histogram bars denote significant differences in V-ATPase activity in root tissues of H and L genotypes ( $P < 0.05$ ); an asterisk (\*) at the top of the histogram bars denote significant differences between V-PPase in root tissues of H and L genotypes ( $P < 0.05$ ). Vertical bars indicate SD ( $n = 6$ ). Mean rates of  $\text{NO}_3^-$  flux during 160 s within vacuoles of root tissues of H and L genotypes at flowering stage (B). Different letters at the top of the histogram bars denote significant differences in  $\text{NO}_3^-$  flux between H and L genotypes ( $P < 0.05$ ). Vertical bars indicate SD ( $n = 6$ ). Accumulation of  $\text{NO}_3^-$  in the vacuole and in the protoplasts of root tissues at the flowering stage (C). Values above the bars represent the percentage of vacuolar  $\text{NO}_3^-$  relative to the total  $\text{NO}_3^-$  in protoplasts.  $\text{NO}_3^-$  accumulation in the cytosol of root tissues at flowering (D). P-V is the total  $\text{NO}_3^-$  in the cytosol and was calculated as total  $\text{NO}_3^-$  in protoplasts – total  $\text{NO}_3^-$  in vacuole. Different letters at the top of the histogram bars denote significant differences in total  $\text{NO}_3^-$  between H and L genotypes ( $P < 0.05$ ). Vertical bars indicate SD ( $n = 6$ ).

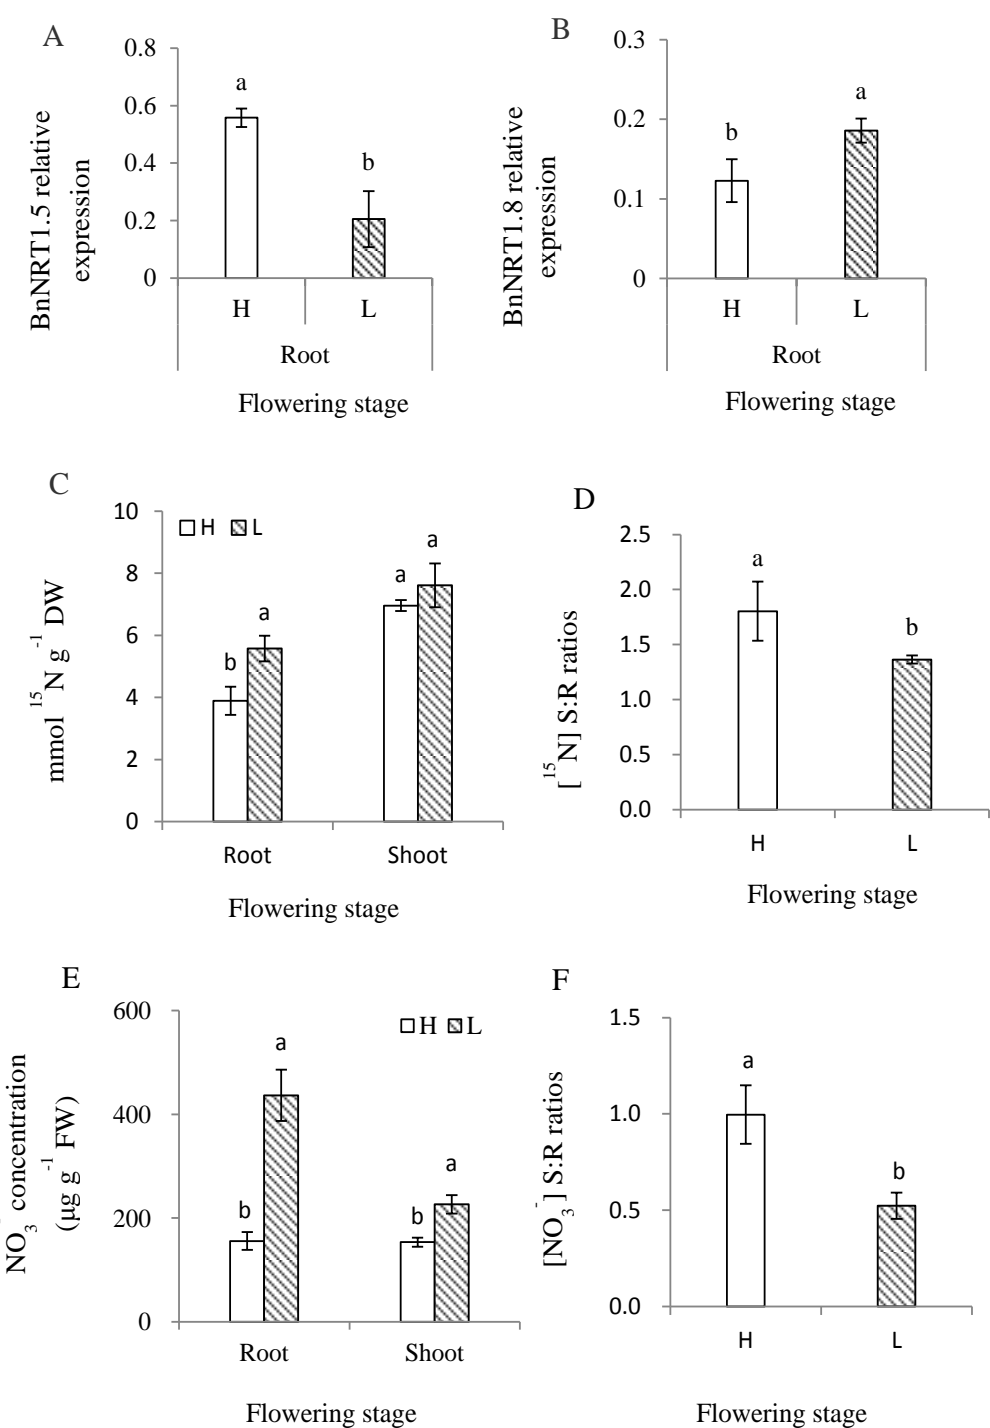

**Supplemental Figure 2.** *B. napus* with higher NUE showed enhanced long-distance transport of  $\text{NO}_3^-$  from roots to shoots at flowering stage. H refers to the high-NUE genotype Xiangyou15 and L refers to the low-NUE genotype 814.

Expression of *BnNRT1.5* (**A**) and *BnNRT1.8* (**B**) genes relative to that of the actin gene in root tissues of the two genotypes at flowering stage assessed by quantitative RT-PCR as described in Materials and Methods; a value of 1.0 is equivalent to the level of expression of the *Bnactin* gene. Vertical bars indicate SD (n=3); different letters at the top of the histogram bars denote significant differences at  $P < 0.05$ . Hydroponically grown *B. napus* plants were subjected to  $^{15}\text{N}$ -labeling treatment as described in Materials and Methods. The  $^{15}\text{N}$  content in root and shoot tissues of the two genotypes is shown at flowering stage (**C**). The  $^{15}\text{N}$  S:R ratios in root and shoot tissues of the two genotypes at flowering stage (**D**). Vertical bars indicate SD (n=3), different letters at the top of the histogram bars denote significant differences at  $P < 0.05$ . The  $\text{NO}_3^-$  concentration ( $\mu\text{g g}^{-1}$  FW) in root and shoot tissues of the two genotypes are shown at the flowering stage (**E**). The  $[\text{NO}_3^-]$  S:R ratios of the two genotypes at the flowering (**F**). Vertical bars indicate SD (n=3), different letters at the top of the histogram bars denote significant differences at  $P < 0.05$  level.

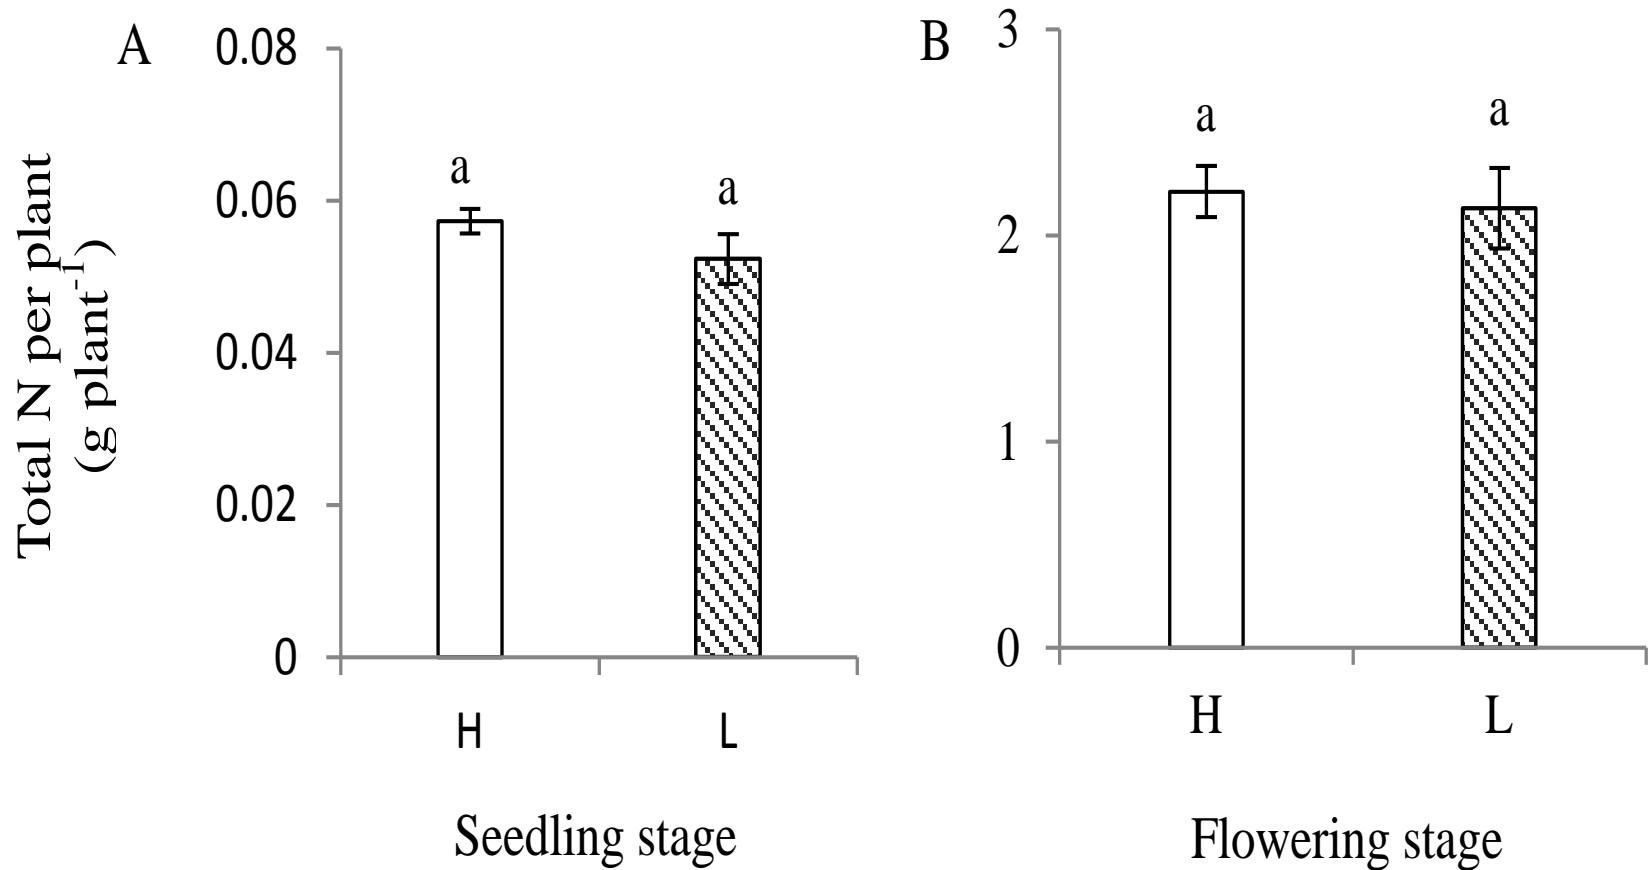

**Supplemental Figure 3.** The two *B. napus* (H and L genotypes) showed the same total N per plant at seedling stage (A) and flowering stage (B).

*B. napus* H and L genotypes are described in Materials and Methods. Vertical bars indicate SD (n=3), different letters at the top of the histogram bars denote significant differences at  $P < 0.05$ .

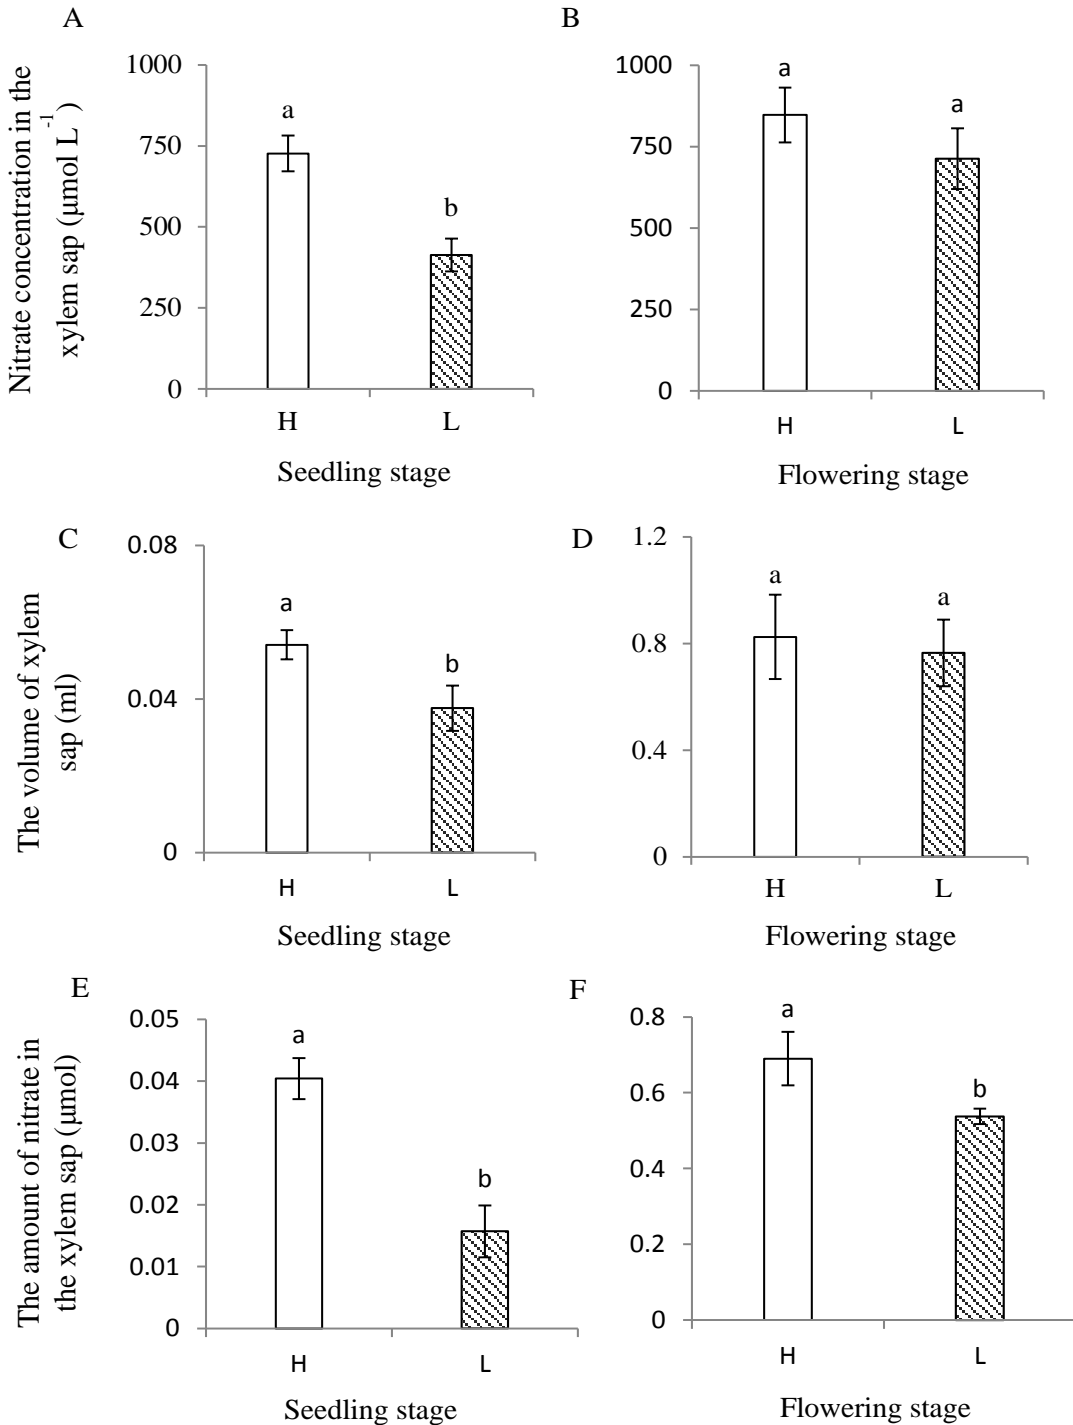

**Supplemental Figure 4.** *B. napus* with higher NUE showed increased  $\text{NO}_3^-$  concentration in the xylem sap at seedling and flowering stages. *B. napus* genotypes H and L are described in Materials and Methods.  $\text{NO}_3^-$  concentrations in the xylem sap of the two genotypes are shown at seedling (**A**) and at flowering (**B**) stages, respectively. Volume of xylem sap collected in 1h from the two genotypes is shown at seedling stage (**C**) and at flowering stage (**D**). Amount of  $\text{NO}_3^-$  in the xylem sap from the two genotypes at seedling stage (**E**) and flowering stage (**F**). Vertical bars indicate SD ( $n=3$ ), different letters at the top of the histogram bars denote significant differences at  $P<0.05$  level.

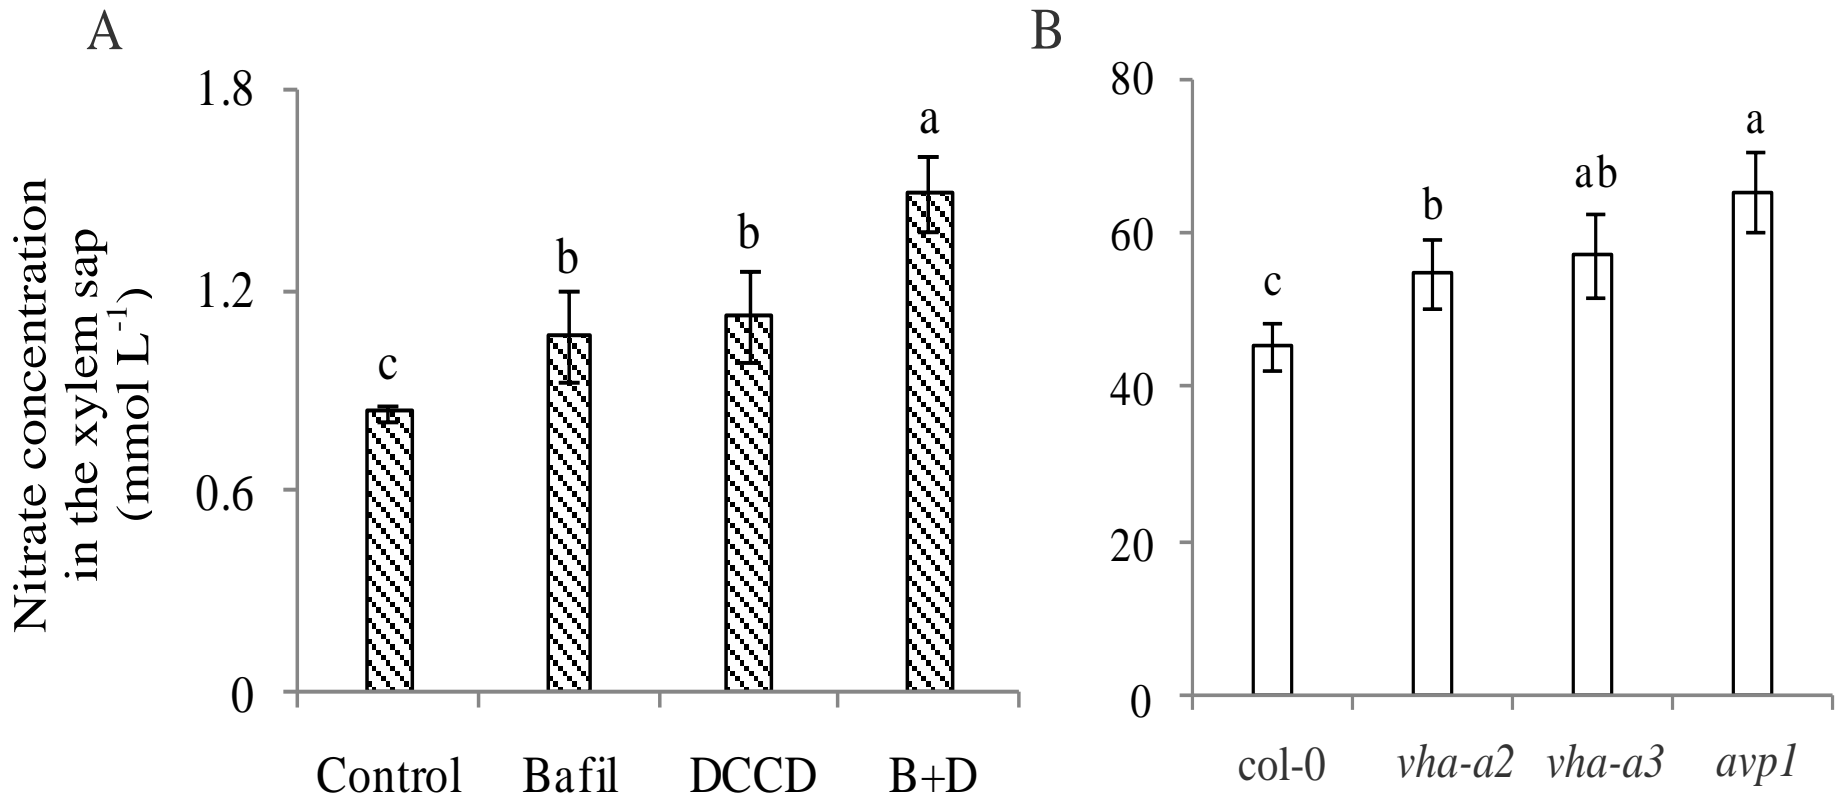

**Supplemental Figure 5.**  $\text{NO}_3^-$  concentration in the xylem sap as affected by inhibitor treatments in *B. napus* and in the energy pumps' mutants of *A. thaliana* (*col-0*, *vha-a2*, *vha-a3*, *avp1*). Inhibitors were applied in the hydroponic solution. *A. thaliana* plants were as defined in the legend to Fig. 4. Growth conditions for hydroponically grown plants with  $^{15}\text{N}$  treatment are described in Materials and Methods.  $\text{NO}_3^-$  concentration in the xylem sap as affected by inhibitor treatments are depicted for *B. napus* (**A**) and for various *A. thaliana* (**B**). Different letters at the top of the histogram bars denote significant differences ( $P < 0.05$ ). Vertical bars on the figures indicate SD ( $n=3$ ).

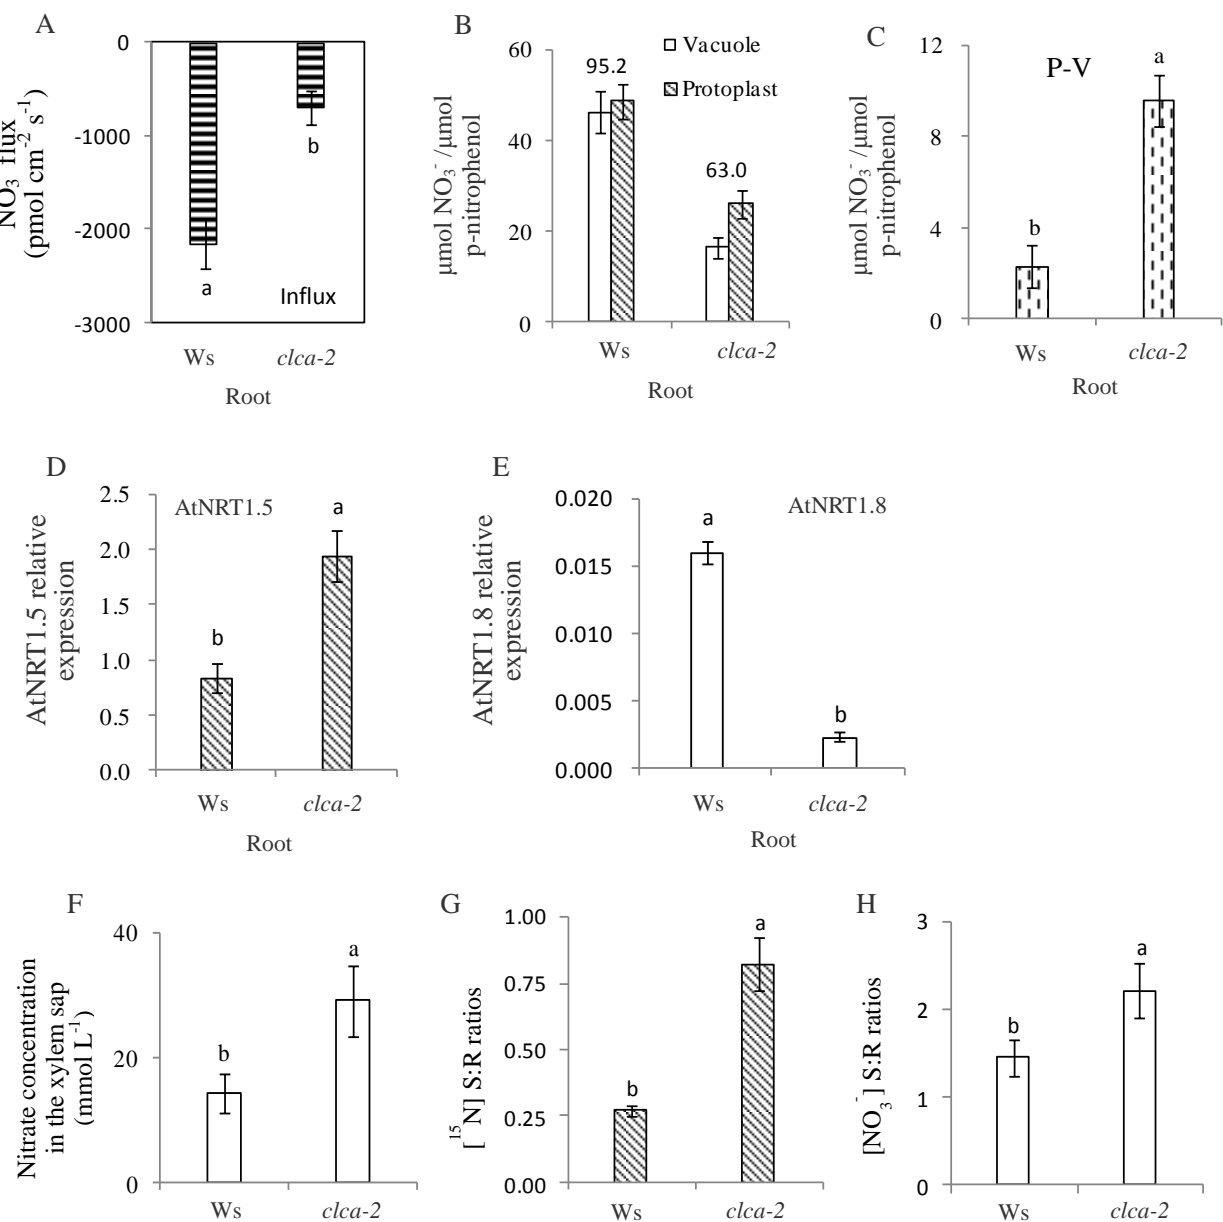

**Supplemental Figure 6.** Reduced VSC for  $\text{NO}_3^-$  in roots drives long-distance transport of  $\text{NO}_3^-$  from roots to shoots in the *A. thaliana* wild type (Ws) and mutant (*clca-2*).

Culture conditions and plant materials are as described in the Materials and Methods. Differences of  $\text{NO}_3^-$  flux within the vacuoles in root tissues between Ws and *clca-2* are shown for seedling stage. Mature vacuoles isolated at the seedling stage from roots of hydroponically grown plants (Ws and *clca-2*) were used for measuring  $\text{NO}_3^-$  flux using the method described in Materials and Methods.

Panel (A) values are mean rates of  $\text{NO}_3^-$  flux during 160 s. The  $\text{NO}_3^-$  distribution between the vacuole and protoplast is shown at seedling stage (B). Protoplasts and vacuoles isolated from root tissues of hydroponically-grown plants (Ws and *clca-2*) were used to measure  $\text{NO}_3^-$  concentrations as described in Materials and Methods.  $\text{NO}_3^-$  accumulation in the cytosolic shown at seedling stage (C).

P-V total  $\text{NO}_3^-$  in the cytosol was calculated following as: total  $\text{NO}_3^-$  in protoplasts – total  $\text{NO}_3^-$  inside vacuoles. Relative expression of *AtNRT1.5* (D) and *AtNRT1.8* (E) are shown for root tissues of Ws and *clca-2* at seedling stage. Expression values are relative to that of the actin gene assessed by quantitative RT-PCR as described in Materials and Methods; a value of 1.0 is equivalent to levels of expression of the *Atactin2* gene. Differences of  $\text{NO}_3^-$  concentration are shown in the xylem sap (F),  $^{15}\text{N}$  S:R ratio (G) and  $[\text{NO}_3^-]$  S:R ratio (H) between Ws and *clca-2*. Four weeks old *Arabidopsis* plants were chosen for the assay of the above parameters. Treatments and measurement methods are defined in the Materials and Methods. Wild type *A. thaliana* (Ws), *AtCLCa* mutants (*clca-2*) are described in Materials and Methods. Different letters at the top of the histogram bars denote significant differences ( $P < 0.05$ ). Vertical bars indicate SD ( $n=6$ ).

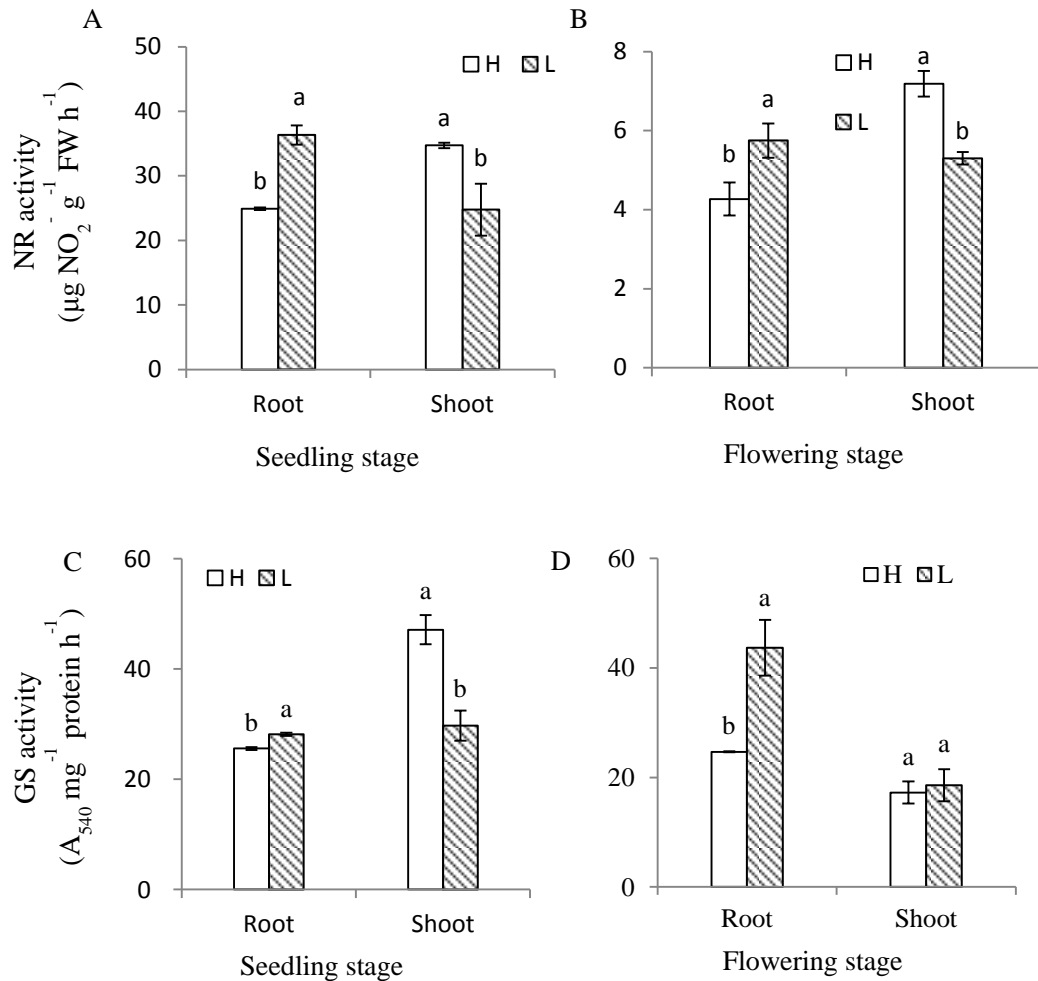

**Supplemental Figure 7.** Differences of NR and GS activities between the two *B. napus* (H and L genotypes) at seedling and flowering stages. NR activity in root and shoot tissues of the two *B. napus* genotypes (H and L genotypes) at the seedling (**A**) and flowering stages (**B**). GS activity in the root and shoot tissues of the two *B. napus* genotypes (H and L genotypes) at seedling (**C**) and flowering stage (**D**). Vertical bars indicate SD (n=3), different letters at the top of the histogram bars denote significant differences at  $P < 0.05$ .

**A**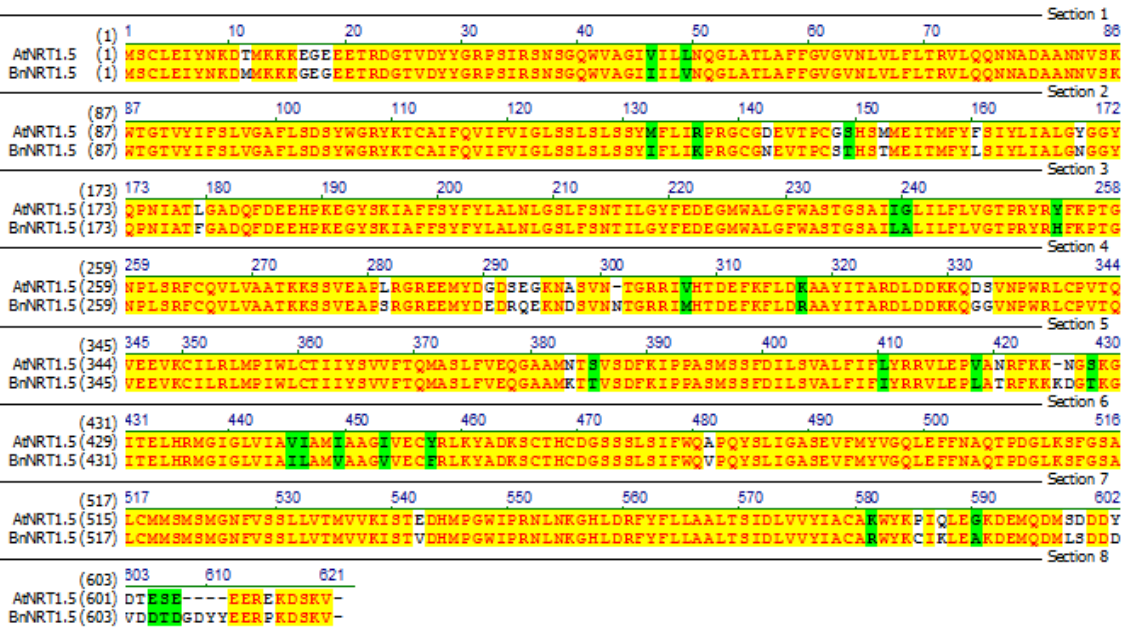

**Supplemental Figure 8.** Amino acid sequences of *BnNRT1.5* and *BnNRT1.8*.

The full nucleotide sequence of *BnNRT1.5* and *BnNRT1.8* obtained from the PCR amplification and the primer design used for PCR amplification of *BnNRT1.5* was based on the nucleotide sequence of *AtNRT1.5* in the *A. thaliana* and GenBank accession EV220114.1; and that of *BnNRT1.8* was based on GenBank accession EV116423.1. Primer sequences for *BnNRT1.5* (*NRT1.5*-F1:tgtatgatgaagatagacaag, *NRT1.5*-R1:gatcagtttctgttcatcac; *NRT1.5*-F2:atgtcttgcttagagatta, *NRT1.5*-R2:tgtcatcaagatctctgtctg). The primer sequences for *BnNRT1.8* (*NRT1.8*-F1:gatgactctgttgaaggaca, *NRT1.8*-R1:tatatcagaacaagctcagct; *NRT1.8*-F2:atggatcaaaaagttagaca, *NRT1.8*-R2:aaagcagagcctgtagacg).

The coding region of *BnNRT1.5* was 1863 bp long, and encodes 620 amino acids, the similarity of nucleotide and amino acids sequences between *AtNRT1.5* and *BnNRT1.5* were 89.4% and 90.0%, respectively (A). The coding region of *BnNRT1.8* was 1752 bp long and encodes 583 amino acids. Similarities between nucleotide sequences and amino acid sequences of *AtNRT1.5* and *BnNRT1.5* were 88.1% and 90.8%, respectively (B).

**B**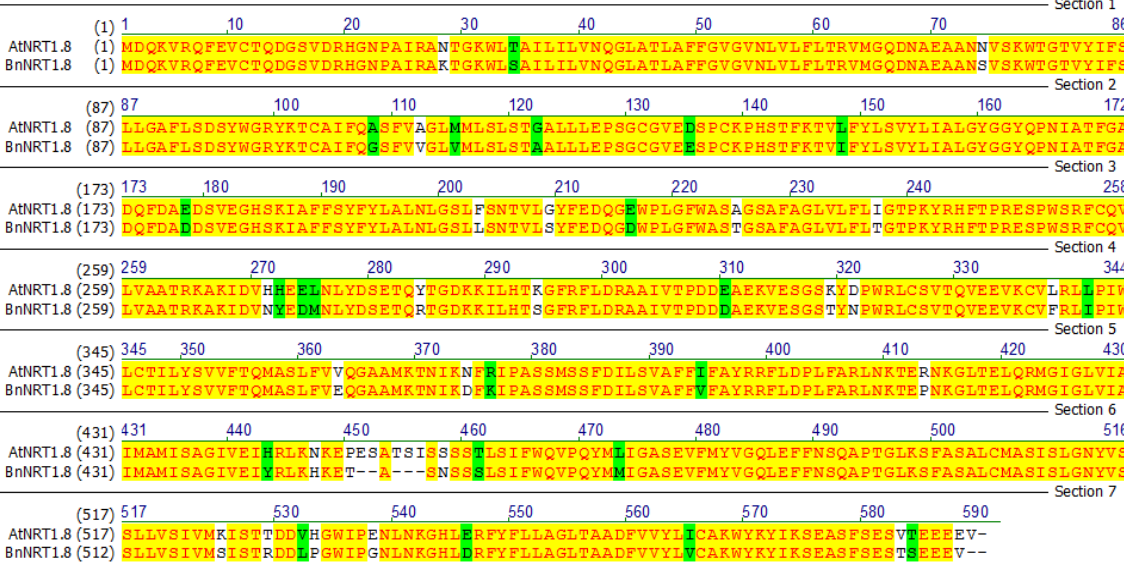



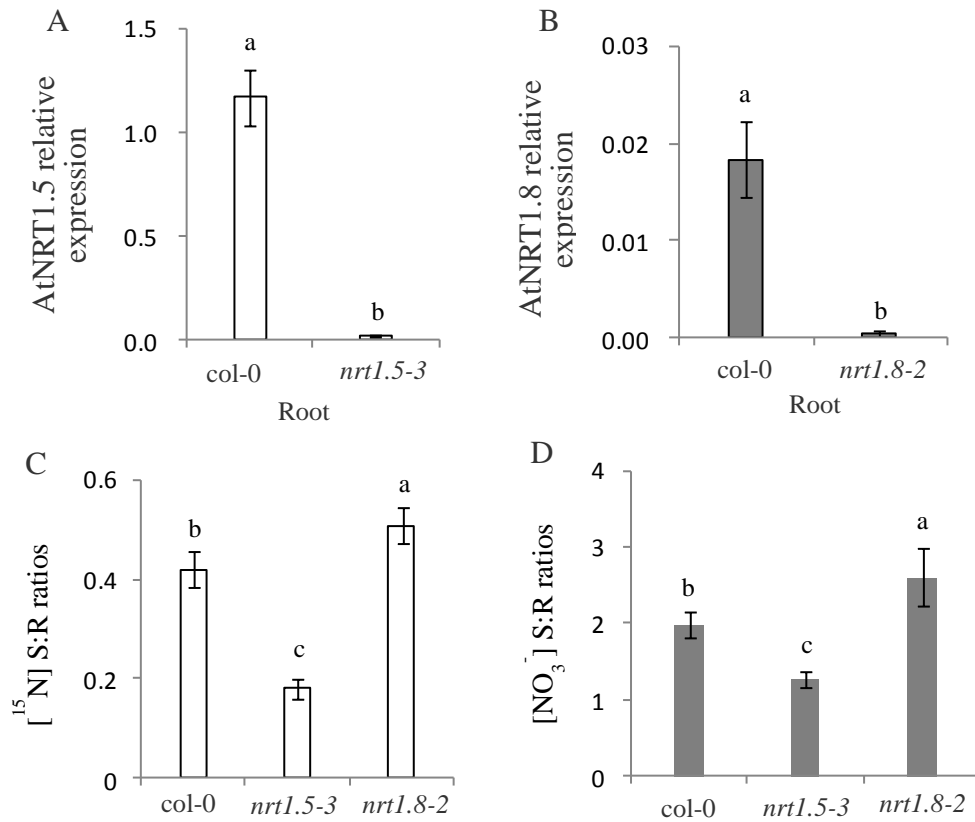

**Supplemental Figure 9.** Functions of *AtNRT1.5* and *AtNRT1.8* genes in root tissues of *A. thaliana* in controlling NO<sub>3</sub><sup>-</sup> long-distance transport from roots to shoots.

Treatment and measurement methods, culture conditions and plant materials are described in the Materials and Methods. Expression of *AtNRT1.5* and *AtNRT1.8* are described in Materials and Methods and in Figure S5. Abbreviations of the mutant and wild-type names are described in the legends to Figures S1. Relative expression of *AtNRT1.5* in root tissues of *col-0* and *nrt1.5-3* at the seedling stage (**A**). Relative expression of *AtNRT1.8* in root tissues of *col-0* and *nrt1.8-2* at the seedling (**B**). Differences are shown for [<sup>15</sup>N] S:R ratio (**C**) and [NO<sub>3</sub><sup>-</sup>] S:R ratio (**D**) between *col-0*, *nrt1.5-3* and *nrt1.8-2*. Different letters at the top of the histogram bars denote significant differences ( $P < 0.05$ ). Vertical bars indicate SD (n=3).

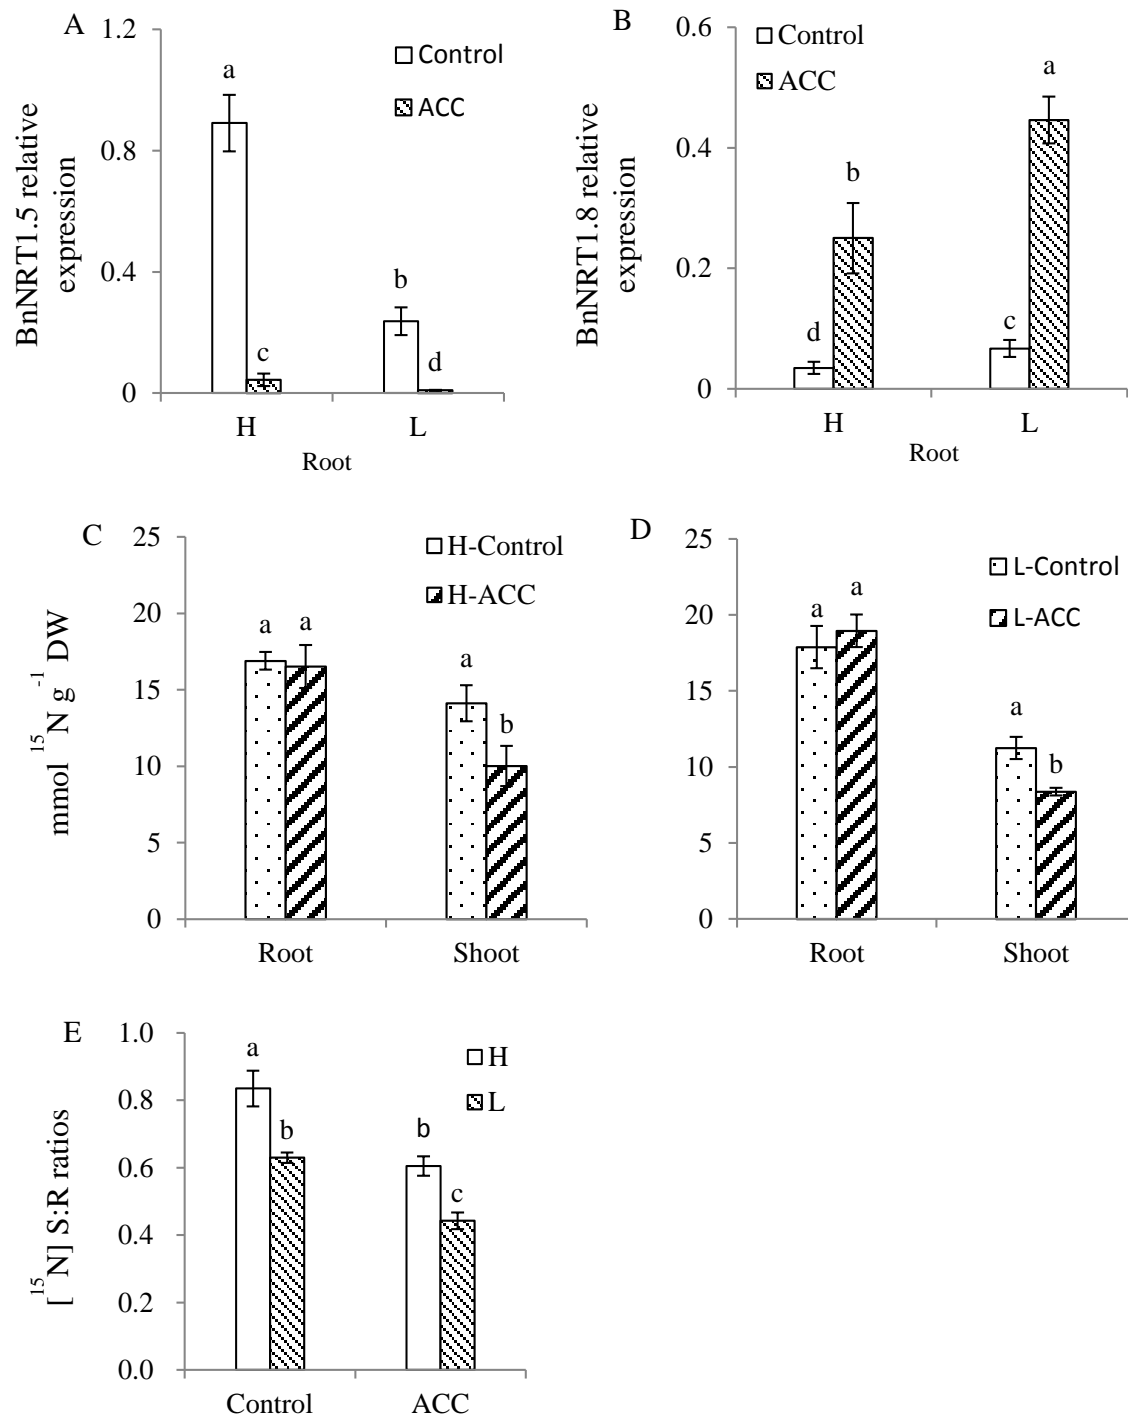

**Supplemental Figure 10.** *B. napus* *BnNRT1.5* and *BnNRT1.8* genes in root tissues were coordinately modulated to facilitate  $\text{NO}_3^-$  long distance transport from roots to shoots. *BnNRT1.5* expression in root tissues was down-regulated by ACC treatment at seedling stage (**A**). *BnNRT1.8* expression in root tissues was up-regulated by ACC at seedling stage (**B**). Expression of *BnNRT1.5* and *BnNRT1.8* relative to that of the actin gene was assessed by quantitative RT-PCR as described in Materials and Methods; a value of 1.0 is equivalent to levels of expression of the *Bnactin* gene. Effects of ACC on the distribution of  $^{15}\text{N}$  between the root and shoot tissues are shown for the H genotype (**C**) and L genotype (**D**) and its effects on [ $^{15}\text{N}$ ]S:R ratios between the H and L genotypes of *B. napus* are shown in (**E**). Vertical bars indicate SD (n=3), different letters at the top of the histogram bars denote significant differences at  $P < 0.05$  level.

1 **Supplemental Table 1. Differences in stomatal conductance and transpiration rate**  
 2 **between the two *B. napus* genotypes**

| Genotypes | Seedling stage                                                                               |                                                                                | Flowering stage                                                                 |                                                                                |
|-----------|----------------------------------------------------------------------------------------------|--------------------------------------------------------------------------------|---------------------------------------------------------------------------------|--------------------------------------------------------------------------------|
|           | Stomatal conductance <sup>a</sup><br>(mol H <sub>2</sub> O m <sup>-2</sup> s <sup>-1</sup> ) | Transpiration rate<br>(mmol H <sub>2</sub> O m <sup>-2</sup> s <sup>-1</sup> ) | Stomatal conductance<br>(mol H <sub>2</sub> O m <sup>-2</sup> s <sup>-1</sup> ) | Transpiration rate<br>(mmol H <sub>2</sub> O m <sup>-2</sup> s <sup>-1</sup> ) |
| H         | 0.33±0.03a                                                                                   | 5.26±0.35a                                                                     | 0.24±0.03a                                                                      | 2.48±0.25a                                                                     |
| L         | 0.26±0.01b                                                                                   | 4.89±0.13b                                                                     | 0.16±0.02b                                                                      | 1.76±0.14b                                                                     |

3 <sup>a</sup>Measurements of stomatal conductance and transpiration rates were conducted at 1000 h  
 4 using a LI-6400 Portable Photosynthesis System. Measurements were made on the 4<sup>th</sup> leaf  
 5 from the bottom at seedling stage and the 12<sup>th</sup> leaf from the bottom at flowering. Different  
 6 letters denote significant difference between the two genotypes at  $P < 0.05$  level, SD (n=6).

1 **Supplemental Table 2. Sequences of primer<sup>a</sup> used for qRT-PCR**

| <b>Gene information</b>     | <b>Forward primer</b>    | <b>Reverse primer</b>    |
|-----------------------------|--------------------------|--------------------------|
| <i>BnActin</i> (AF111812)   | GGTCGGGACCTCACTGATTC     | CAACGGAATCTCTCAGCTCC     |
| <i>BnNRT1.5</i> (EV220114)  | CAATCTACTTGATCGCATTG     | CCTGTAGGCTTGAAGTTTCG     |
| <i>BnNRT1.8</i> (EV116423)  | GGCAAATGGCTCAGTGCTAT     | GCAACCACTTGGTTCAAGTA     |
| <i>AtActin2</i> (AT3g18780) | TCGGTGGTTCCATCTTGCTTC    | TGGACCTGCCTCATCATACTCG   |
| <i>AtNRT1.5</i> (At1g32450) | TGGAGCGTTTCTCAGCGATT     | TCCATCATGGAATGTGAACCAC   |
| <i>AtNRT1.8</i> (At4g21680) | TCTTCATCTTCGCATACAGGCGGT | GCCATTATCGCAATCACAAGCCCA |

2 <sup>a</sup>Primer sequences optimized in our laboratory using published data are described further in  
3 Materials and Methods.

4

5

6
